# Supplementary material for: Extracellular Vesicles-Based Biomarkers Represent a Promising Liquid Biopsy in Endometrial Cancer
Source: Cancers (Basel). 2019 Dec 12;11(12):2000. doi: 10.3390/cancers11122000 (PMC6966595; doi:10.3390/cancers11122000)
Supplement: Supplementary file 1 [file cancers-11-02000-s001.pdf]

# Extracellular Vesicles-Based Biomarkers Represent a Promising Liquid Biopsy in Endometrial Cancer

Carolina Herrero, Alexandre de la Fuente, Carlos Casas-Arozamena, Victor Sebastian, Martin Prieto, Manuel Arruebo, Alicia Abalo, Eva Colás, Gema Moreno-Bueno, Antonio Gil-Moreno, Ana Vilar, Juan Cueva, Miguel Abal and Laura Muinelo-Romay

## Supplementary Figures

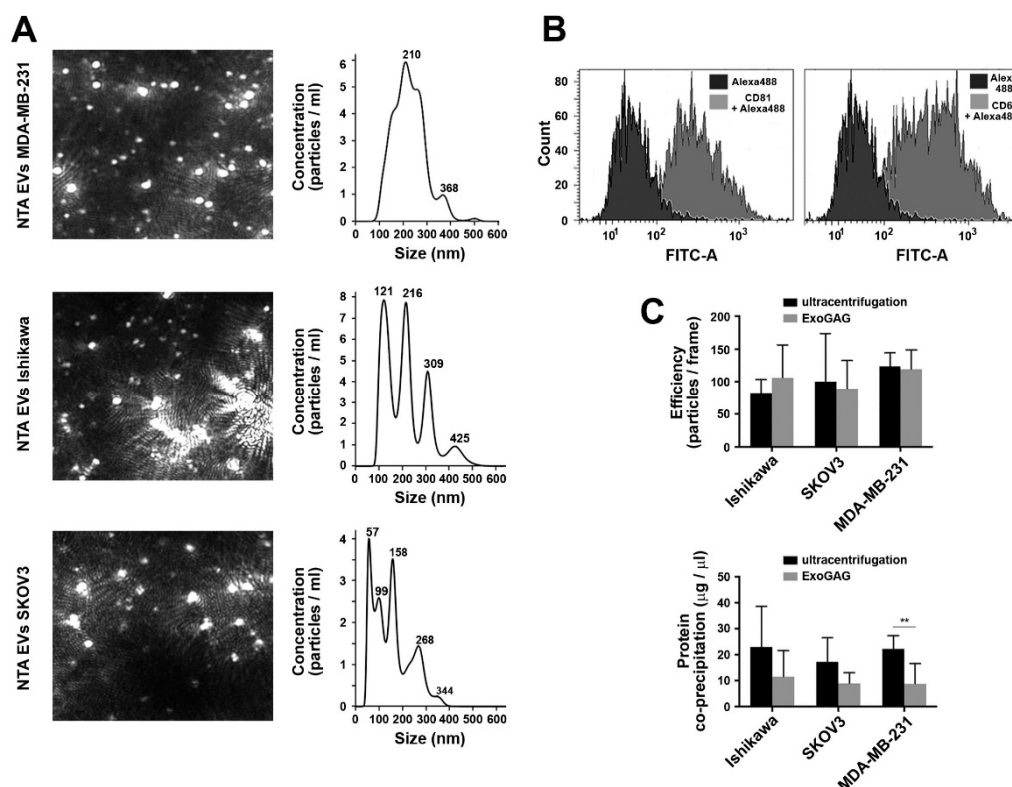

**Figure S1.** Characterization of MDA-MB-231, Ishikawa and SKOV3 EVs isolated by ExoGAG. **(A)** Representative NTA Nanosight NS300 image of isolated MDA-MB-231 EVs (upper panel), Ishikawa EVs (middle panel) and SKOV3 EVs (lower panel) expressed in size (nm) and concentration (particles/ml) ( $n = 3$ ); **(B)** Cytometry analysis of MDA-MB-231 EVs resulted in a specific CD81 and CD63 labelling ( $n = 2$ ); **(C)** Efficiency of purified EVs, expressed as EVs particles per frame, was found similar in ExoGAG and ultracentrifugation in all three cell lines (upper graph) ( $n = 3$ ). Protein co-precipitation levels quantified by BCA assay showed a low protein co-precipitation in EVs isolated by ExoGAG compared to those isolated by ultracentrifugation in Ishikawa, SKOV3 and MDA-MB-231 EVs ( $p = 0.081$ ,  $p = 0.064$ ,  $** p = 0.005$ , respectively, according to paired T-test;  $n = 4$ ) (lower graph).

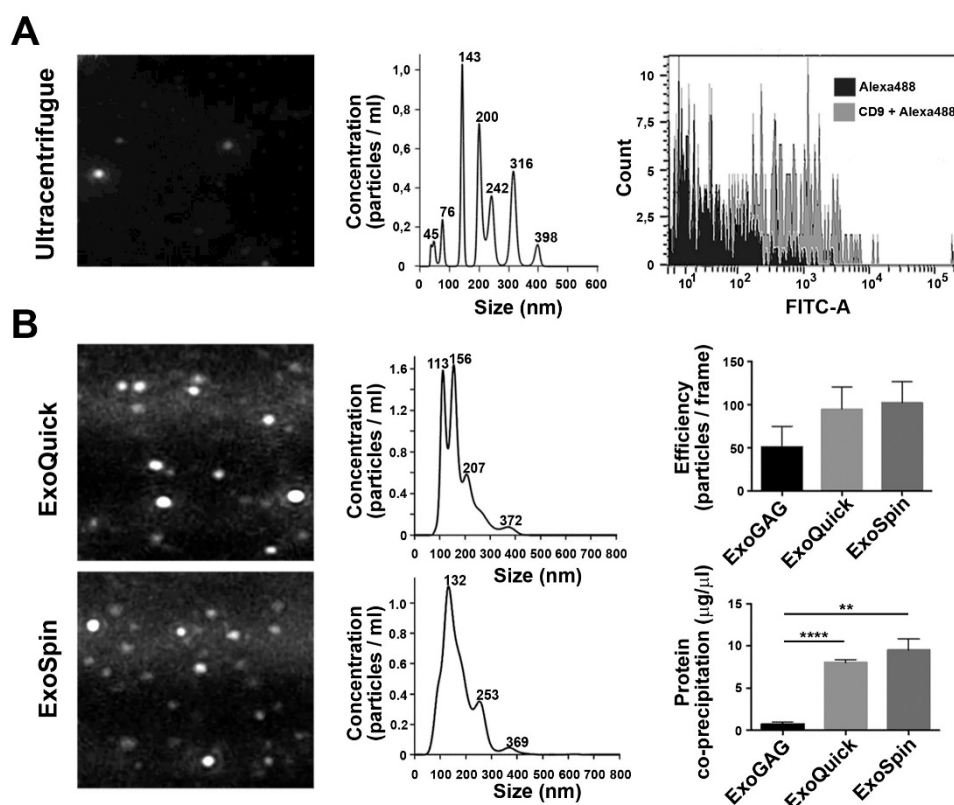

**Figure S2.** Characterization of plasma EVs isolated by ultracentrifugation, ExoQuick and ExoSpin. **(A)** Ultracentrifugation: EVs were collected at high speed ultracentrifugation ( $100,000 \times g$ , 16 h,  $4^\circ\text{C}$ ) in a SW32Ti rotor (Beckman Coulter, Brea, CA, USA) and resuspended in PBS. NTA Nanosight NS300 particle tracking profile of plasma EVs isolated by ultracentrifugation expressed in size (nm) and concentration (particles/ml) resulted in a low efficiency of recovery (left panel);  $n = 2$ . Cytometry analysis showed a specific CD9 labelling of EVs purified (right panel) ( $n = 2$ ); **(B)** ExoQuick:  $50 \mu\text{L}$  of plasma samples were incubated with  $13.4 \mu\text{L}$  of ExoQuick reagent during 30 min and collected by centrifugation at  $3000 \times g$ , 10 min,  $4^\circ\text{C}$  (Eppendorf, Hamburg, Germany). ExoSpin:  $50 \mu\text{L}$  of plasma samples were incubated with  $25 \mu\text{L}$  of ExoSpin reagent for 5min and collected by centrifugation at  $16000 \times g$ , 30 min,  $4^\circ\text{C}$  (Eppendorf, Hamburg, Germany). NTA Nanosight NS300 particle tracking profile of plasma EVs isolated by ExoQuick and ExoSpin expressed in size (nm) and concentration (particles/ml) ( $n = 3$ ) (left panel). Efficiency of purified EVs, expressed as the number of EVs per frame, was higher although comparable in ExoQuick and ExoSpin referred to ExoGAG ( $n = 3$ ) meanwhile protein co-precipitation levels quantified by BCA assay showed a low co-precipitation in EVs isolated by ExoGAG compared to those isolated by ExoQuick and ExoSpin (\*\*\*\*  $p < 0.0001$  and \*\*  $p < 0.0014$ , respectively, according to paired T-test;  $n = 4$ ) (right panel).

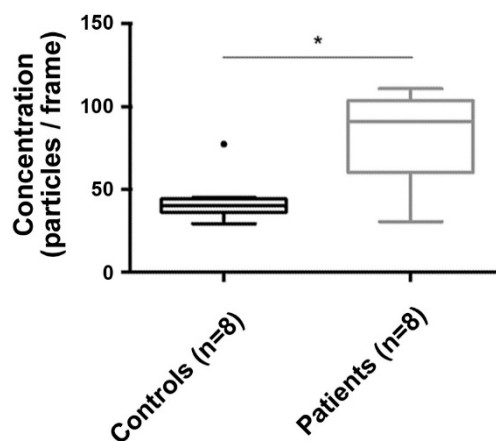

**Figure S3.** Efficiency (particles/frame) of EVs purified by ExoGAG in a representative cohort of endometrial cancer patients ( $n = 8$ ) and healthy controls ( $n = 8$ ). EVs particles levels were significant higher in patients vs. healthy controls (\*  $p = 0.0148$  according to Mann-Whitney U-test).

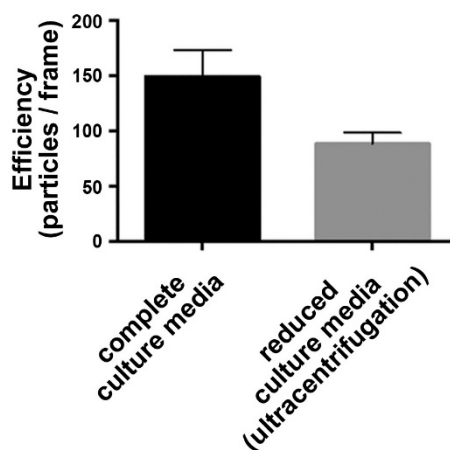

**Figure S4.** Efficiency of ultracentrifugation (16h) to reduce the EVs contain from culture media analysed by NTA Nanosight NS300 and expressed as particles/frame. Complete culture media resulted in a mean of 149.4 particles/frame whereas reduced culture media resulted in 88.85 particles/frame on average ( $n = 2$ ).

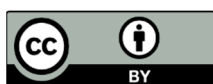

© 2019 by the authors. Licensee MDPI, Basel, Switzerland. This article is an open access article distributed under the terms and conditions of the Creative Commons Attribution (CC BY) license (<http://creativecommons.org/licenses/by/4.0/>).
